# Supplementary material for: Quantification of the Resveratrol Analogs trans-2,3-Dimethoxy-stilbene and trans-3,4-Dimethoxystilbene in Rat Plasma: Application to Pre-Clinical Pharmacokinetic Studies
Source: PubMed Central journal article supplement (PMC6271088; doi:10.3390/molecules19079577), 2014-07-07
Supplement: molecules-19-09577-s001.pdf [file molecules-19-09577-s001.pdf]

# Supplementary Material

**Figure S1.**  $^1\text{H-NMR}$  spectrum ( $\text{CDCl}_3$ , 500 MHz) of 3,4-DMS.

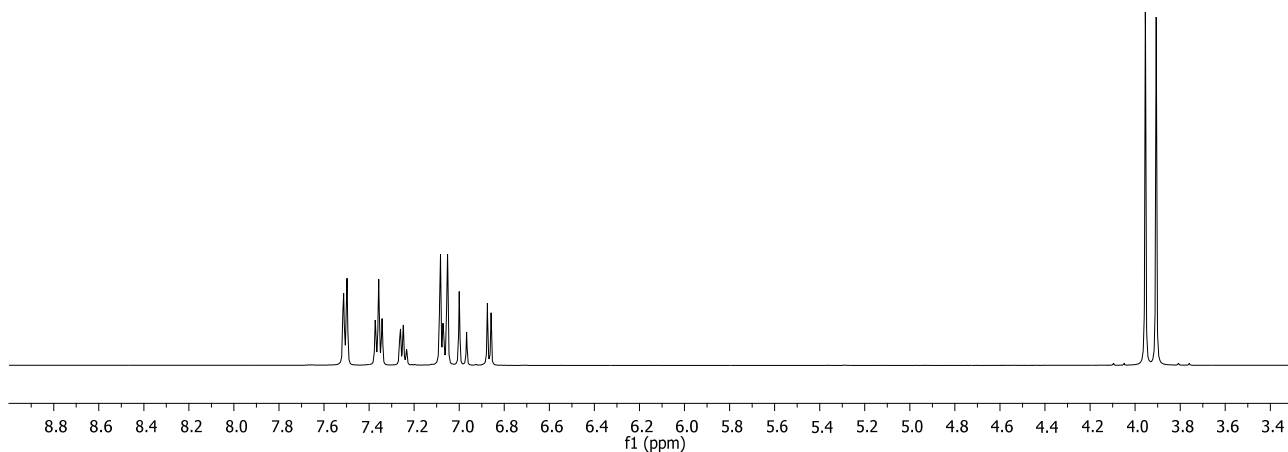

**Figure S2.**  $^{13}\text{C-NMR}$  spectrum ( $\text{CDCl}_3$ , 125 MHz) of 3,4-DMS.

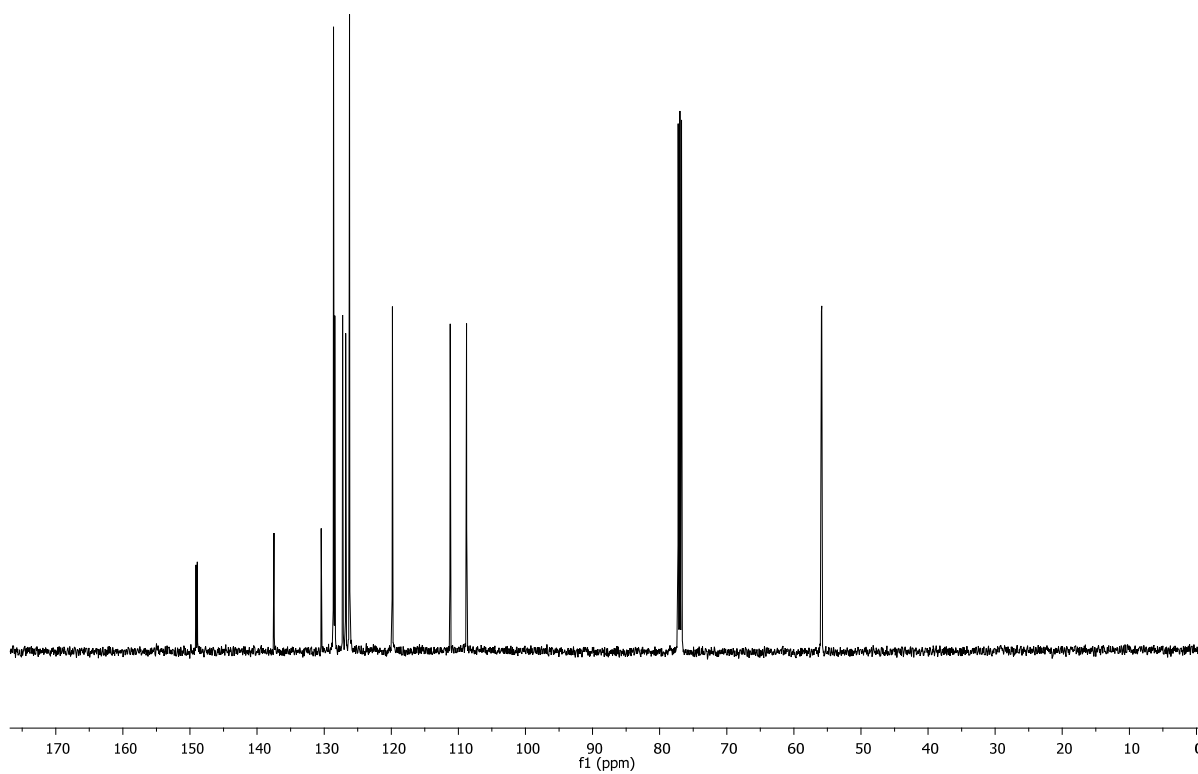

**Figure S3.**  $^1\text{H-NMR}$  spectrum ( $\text{CDCl}_3$ , 500 MHz) of 2,3-DMS.

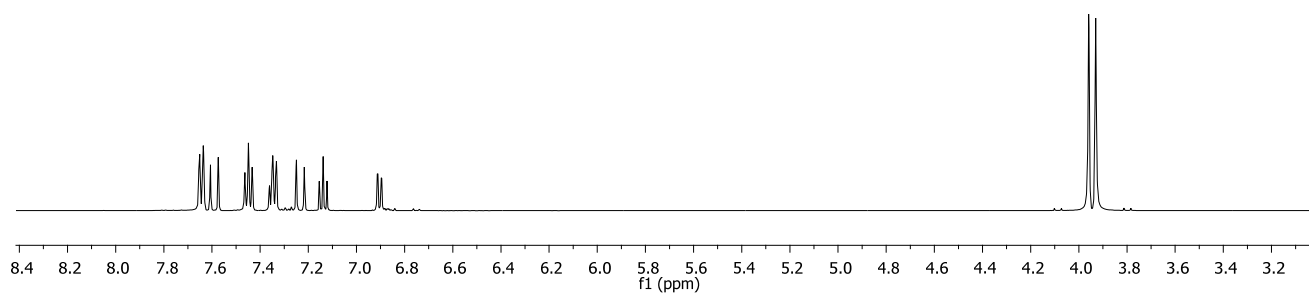

**Figure S4.**  $^{13}\text{C}$ -NMR spectrum ( $\text{CDCl}_3$ , 125 MHz) of 2,3-DMS.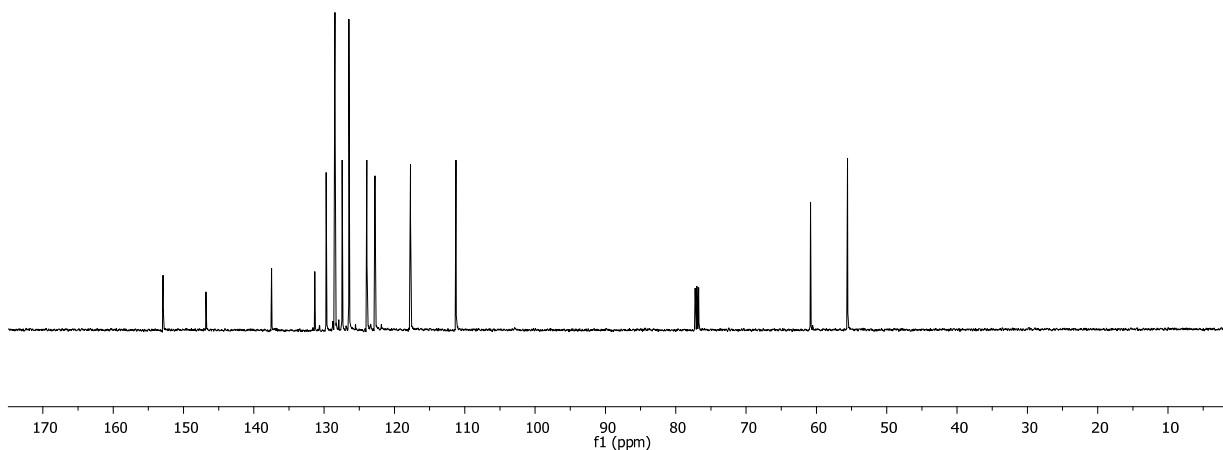**Table S1.** Calculated LogP of polymethoxystilbenes.

| Name                             | Formula | Log P           |
|----------------------------------|---------|-----------------|
| 3,5,4'-trimethoxystilbene        |         | $4.32 \pm 0.26$ |
| 3,4,3',4'-tetramethoxystilbene   |         | $3.98 \pm 0.35$ |
| 2,3-dimethoxystilbene            |         | $3.94 \pm 0.24$ |
| stilbene                         |         | $3.89 \pm 0.19$ |
| 3,4,5,2',4'-pentamethoxystilbene |         | $3.87 \pm 0.36$ |
| 3,4,5,3',5'-pentamethoxystilbene |         | $3.72 \pm 0.36$ |

Table 1S. *Cont.*

| Name                          | Formula                                                                            | Log P       |
|-------------------------------|------------------------------------------------------------------------------------|-------------|
| 3,4-dimethoxystilbene         | 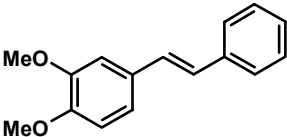 | 3.61 ± 0.24 |
| 3,4,5,4'-tetramethoxystilbene |  | 3.40 ± 0.35 |
